# Supplementary material for: The Internal Dynamics of Fibrinogen and Its Implications for Coagulation and Adsorption
Source: PubMed Central journal article supplement (PMC4569070; doi:10.1371/journal.pcbi.1004346), 2015-09-14

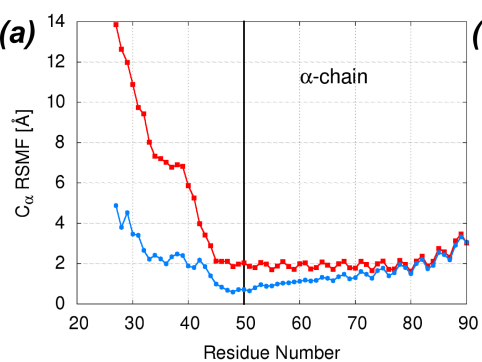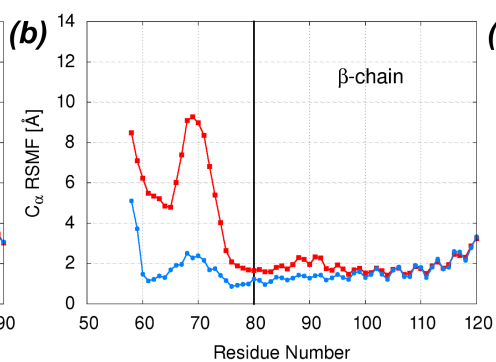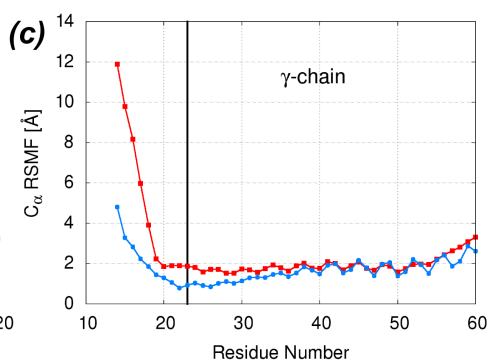

Supplement: pcbi.1004346.s002.pdf [file pcbi.1004346.s002.pdf]
